# Supplementary material for: Genome-Wide and Experimental Resolution of Relative Translation Elongation Speed at Individual Gene Level in Human Cells
Source: PLOS journal article supplement (doi:10.1371/journal.pgen.1005901), 2016-02-29
Supplement: S7 (10.1371/journal.pgen.1005901.s007) [file journal.pgen.1005901.s007]

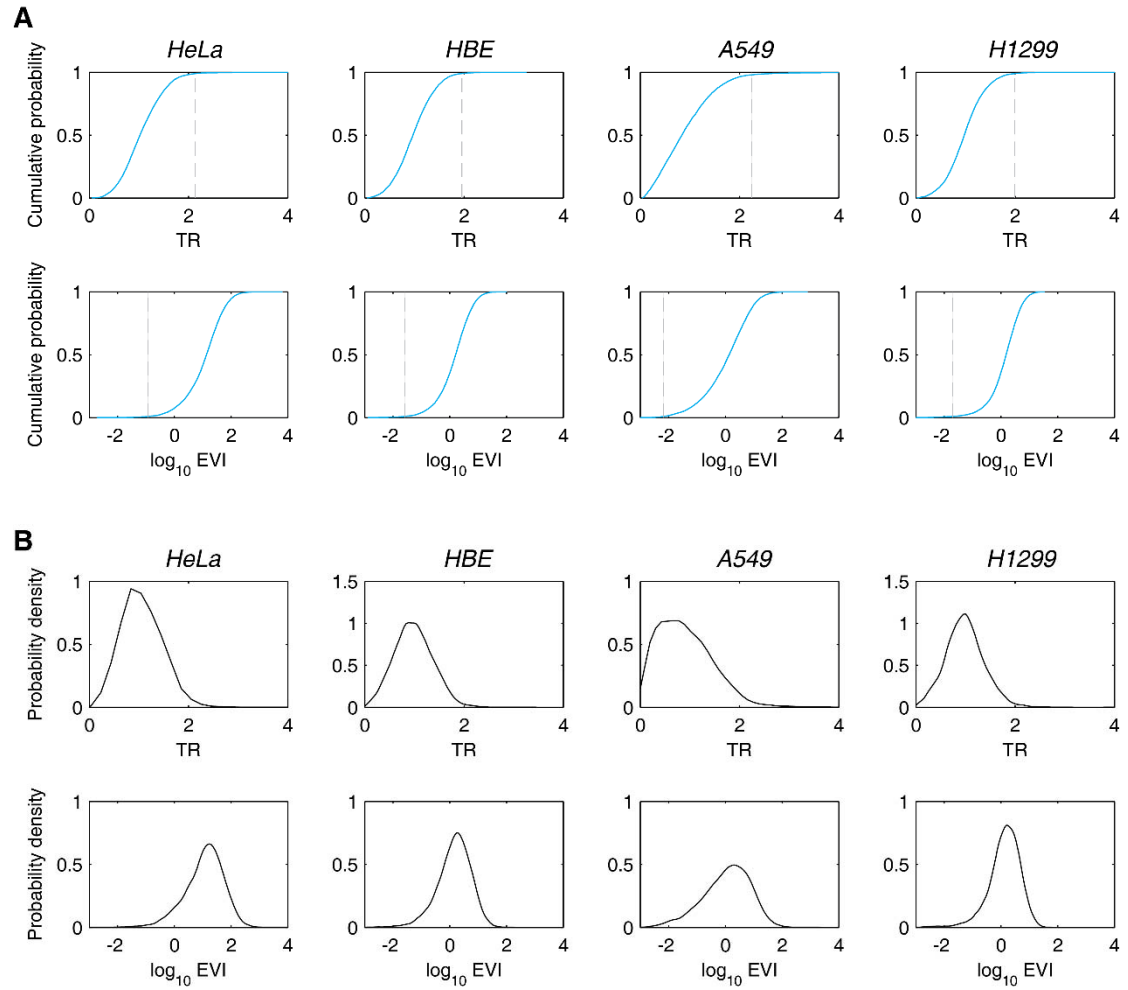

**Figure S2:** The gene distribution based on TR or EVI. (A) Empirical cumulative density function (CDF). The grey dashed line denotes the top 1% of TR or the lowest 1% of EVI. The threshold values are listed in the Supplementary Table S2. (B) Empirical probability density function (PDF).
