# Supplementary material for: Genome-Wide and Experimental Resolution of Relative Translation Elongation Speed at Individual Gene Level in Human Cells
Source: PLOS journal article supplement (doi:10.1371/journal.pgen.1005901), 2016-02-29
Supplement: S8 (10.1371/journal.pgen.1005901.s008) [file journal.pgen.1005901.s008]

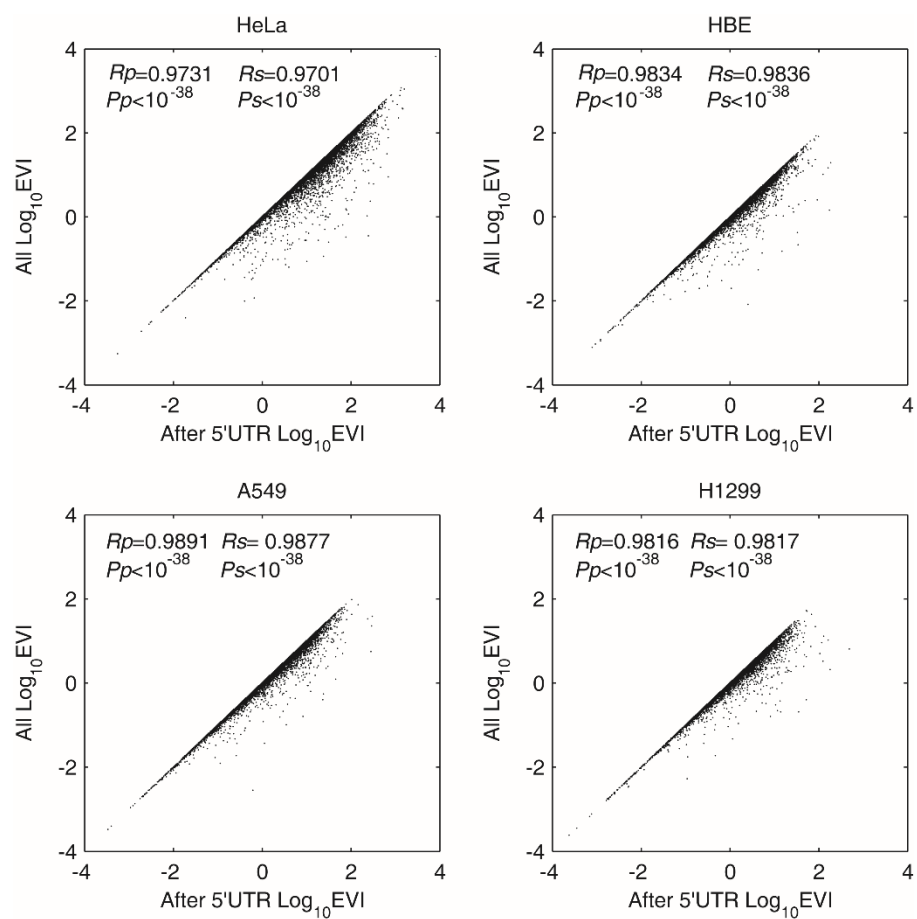

**Figure S3:** The EVI calculated excluding 5'-UTR (x-axes) and the EVI calculated including 5'-UTR (y-axes) in all four tested cell lines.  $R_p$  = Pearson  $R$ ;  $R_s$  = Spearman  $R$ .
