# Supplementary material for: Genome-Wide and Experimental Resolution of Relative Translation Elongation Speed at Individual Gene Level in Human Cells
Source: PLOS journal article supplement (doi:10.1371/journal.pgen.1005901), 2016-02-29
Supplement: S15 (10.1371/journal.pgen.1005901.s015) [file journal.pgen.1005901.s015]

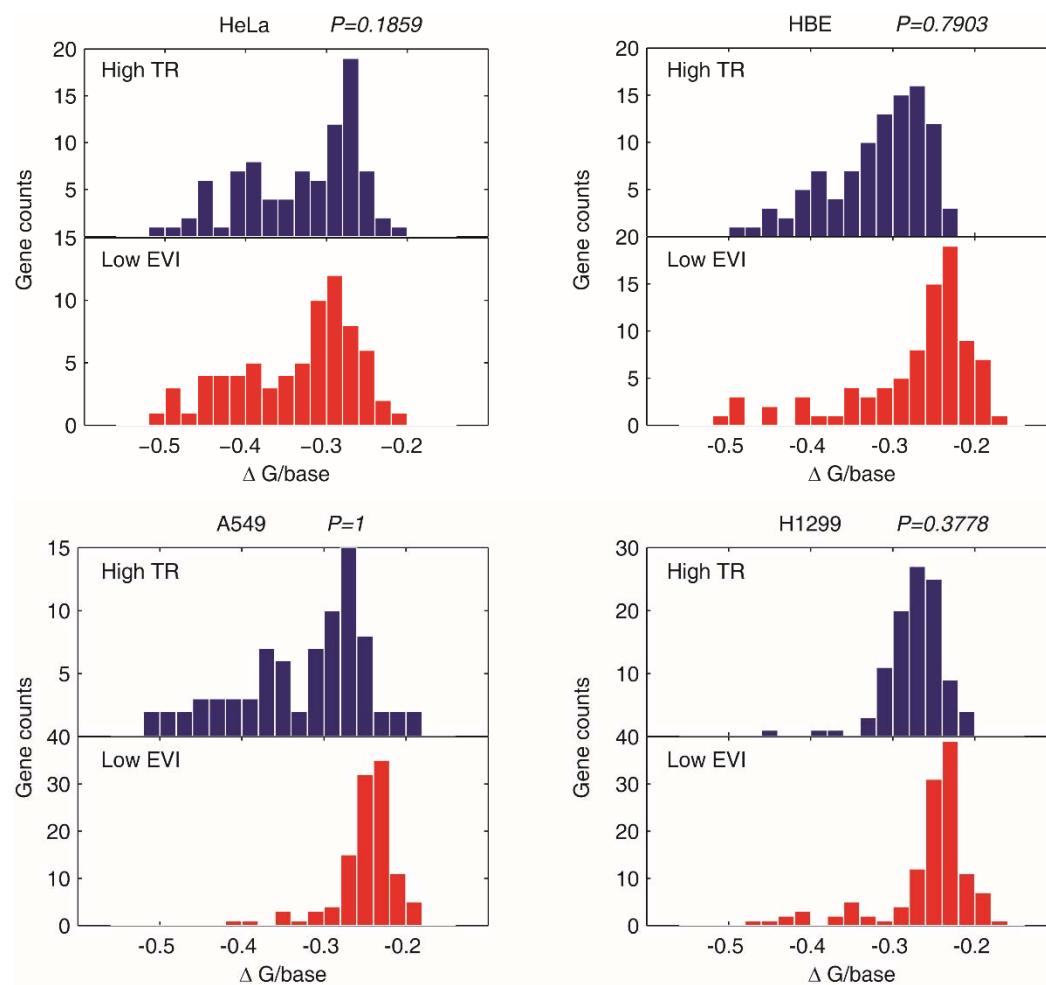

**Figure. S10:** The mRNA folding energy of the low-EVI and high-TR genes in four cell lines, calculated using MFOLD algorithm [1]. One-tailed KS-test were performed for each cell line under the null hypothesis that the low-EVI genes are not more stably folded than the high-TR genes.

1. Zuker, M., *Mfold web server for nucleic acid folding and hybridization prediction*. Nucleic Acids Res, 2003. **31**(13): p. 3406-15.
